# Supplementary material for: Pimarane-Type Diterpenes with Anti-Inflammatory Activity from Arctic-Derived Fungus Eutypella sp. D-1
Source: MDPI journal article supplement (doi:10.3390/md21100541), 2023-10-18

## Supplementary data

### Pimarane-type diterpenes with anti-inflammatory activity from Arctic-derived fungus *Eutypella* sp. D-1

Yaodong Ning <sup>1,†</sup>, Shi Zhang <sup>2,†</sup>, Te Zheng <sup>3</sup>, Yao Xu <sup>1</sup>, Song Li <sup>1</sup>, Jianpeng Zhang <sup>1</sup>, Binghua Jiao <sup>1</sup>, Yun Zhang <sup>3,\*</sup>, Zengling Ma <sup>2,\*</sup> and Xiaoling Lu <sup>1,\*</sup>

<sup>1</sup> Department of Biochemistry and Molecular Biology, College of Basic Medical Sciences, Naval Medical University, Shanghai 200433, China

<sup>2</sup> College of Life and Environmental Sciences, Wenzhou University, Wenzhou 325000, China

<sup>3</sup> Biology Institute, Qilu University of Technology (Shandong Academy of Sciences), Jinan 250000, China

\* Correspondence: luxiaoling80@126.com

† These authors contributed equally to this work.

- S1. <sup>1</sup>H NMR spectrum of eutypellenone F (**1**) in CDCl<sub>3</sub>.
- S2. <sup>13</sup>C NMR spectrum of eutypellenone F (**1**) in CDCl<sub>3</sub>.
- S3. DEPT135 spectrum of eutypellenone F (**1**) in CDCl<sub>3</sub>.
- S4. HSQC spectrum of eutypellenone F (**1**) in CDCl<sub>3</sub>.
- S5. COSY spectrum of eutypellenone F (**1**) in CDCl<sub>3</sub>.
- S6. HMBC spectrum of eutypellenone F (**1**) in CDCl<sub>3</sub>.
- S7. NOESY spectrum of eutypellenone F (**1**) in CDCl<sub>3</sub>.
- S8. HRESIMS of eutypellenone F (**1**).
- S9. UV spectrum of eutypellenone F (**1**).
- S10. ORD result of eutypellenone F (**1**)
- S11. <sup>1</sup>H NMR spectrum of libertellenone Y (**2**) in CDCl<sub>3</sub>.
- S12. <sup>13</sup>C NMR spectrum of libertellenone Y (**2**) in CDCl<sub>3</sub>.
- S13. DEPT135 spectrum of libertellenone Y (**2**) in CDCl<sub>3</sub>.
- S14. HSQC spectrum of libertellenone Y (**2**) in CDCl<sub>3</sub>.
- S15. COSY spectrum of libertellenone Y (**2**) in CDCl<sub>3</sub>.
- S16. HMBC spectrum of libertellenone Y (**2**) in CDCl<sub>3</sub>.
- S17. NOESY spectrum of libertellenone Y (**2**) in CDCl<sub>3</sub>.
- S18. HRESIMS of libertellenone Y (**2**).
- S19. <sup>1</sup>H NMR spectrum of libertellenone Z (**3**) in CDCl<sub>3</sub>.
- S20. <sup>13</sup>C NMR spectrum of libertellenone Z (**3**) in CDCl<sub>3</sub>.
- S21. DEPT135 spectrum of libertellenone Z (**3**) in CDCl<sub>3</sub>.
- S22. HSQC spectrum of libertellenone Z (**3**) in CDCl<sub>3</sub>.
- S23. COSY spectrum of libertellenone Z (**3**) in CDCl<sub>3</sub>.
- S24. HMBC spectrum of libertellenone Z (**3**) in CDCl<sub>3</sub>.

- S25. NOESY spectrum of libertellenone Z (**3**) in CDCl<sub>3</sub>.
- S26. HRESIMS of libertellenone Z (**3**).
- S27. UV spectrum of libertellenone Z (**3**).
- S28. ORD result of libertellenone Z (**3**)
- S29. <sup>1</sup>H NMR spectrum of **4** in CDCl<sub>3</sub>.
- S30. <sup>13</sup>C NMR spectrum of **4** in CDCl<sub>3</sub>.
- S31. <sup>1</sup>H NMR spectrum of **5** in CDCl<sub>3</sub>.
- S32. <sup>13</sup>C NMR spectrum of **5** in CDCl<sub>3</sub>.
- S33. <sup>1</sup>H NMR spectrum of **6** in CDCl<sub>3</sub>.
- S34. <sup>13</sup>C NMR spectrum of **6** in CDCl<sub>3</sub>.
- S35. <sup>1</sup>H NMR spectrum of **7** in CDCl<sub>3</sub>.
- S36. <sup>13</sup>C NMR spectrum of **7** in CDCl<sub>3</sub>.
- S37. The colony and mycelium characteristics of *Eutypella* sp. D-1.

S1.  $^1\text{H}$  NMR spectrum of eutypellenone F (**1**) in  $\text{CDCl}_3$ .

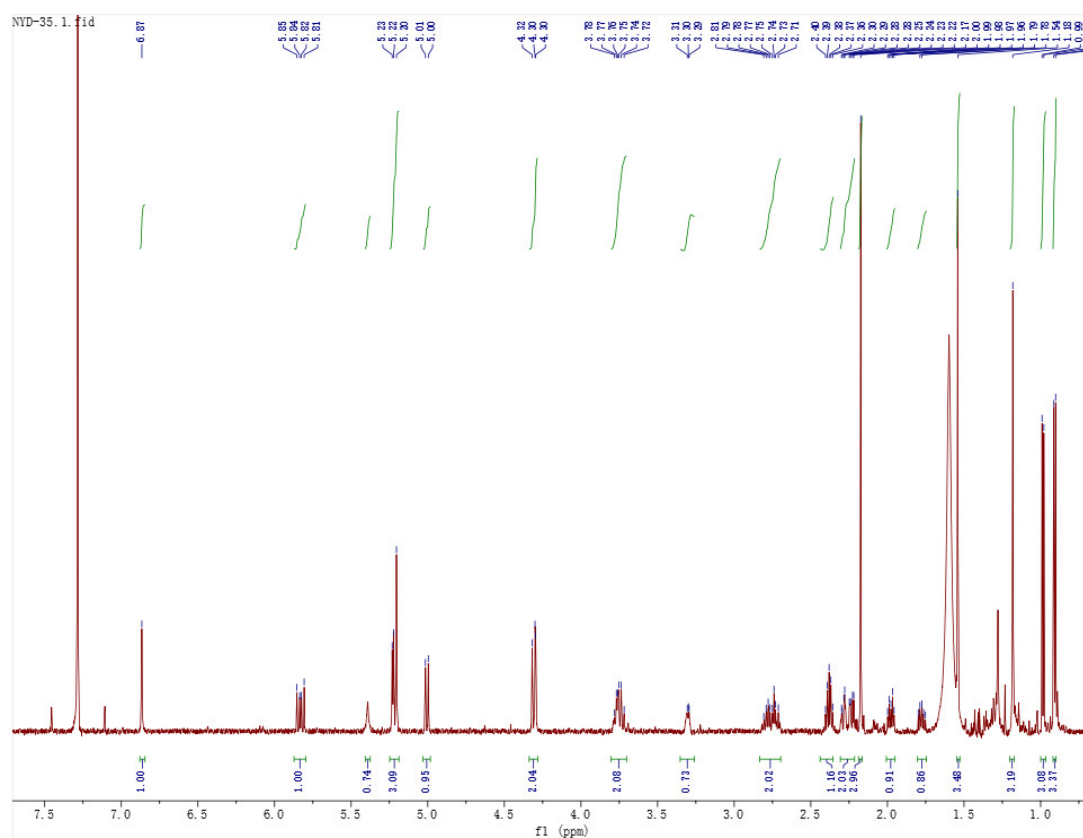

S2.  $^{13}\text{C}$  NMR spectrum of eutypellenone F (**1**) in  $\text{CDCl}_3$ .

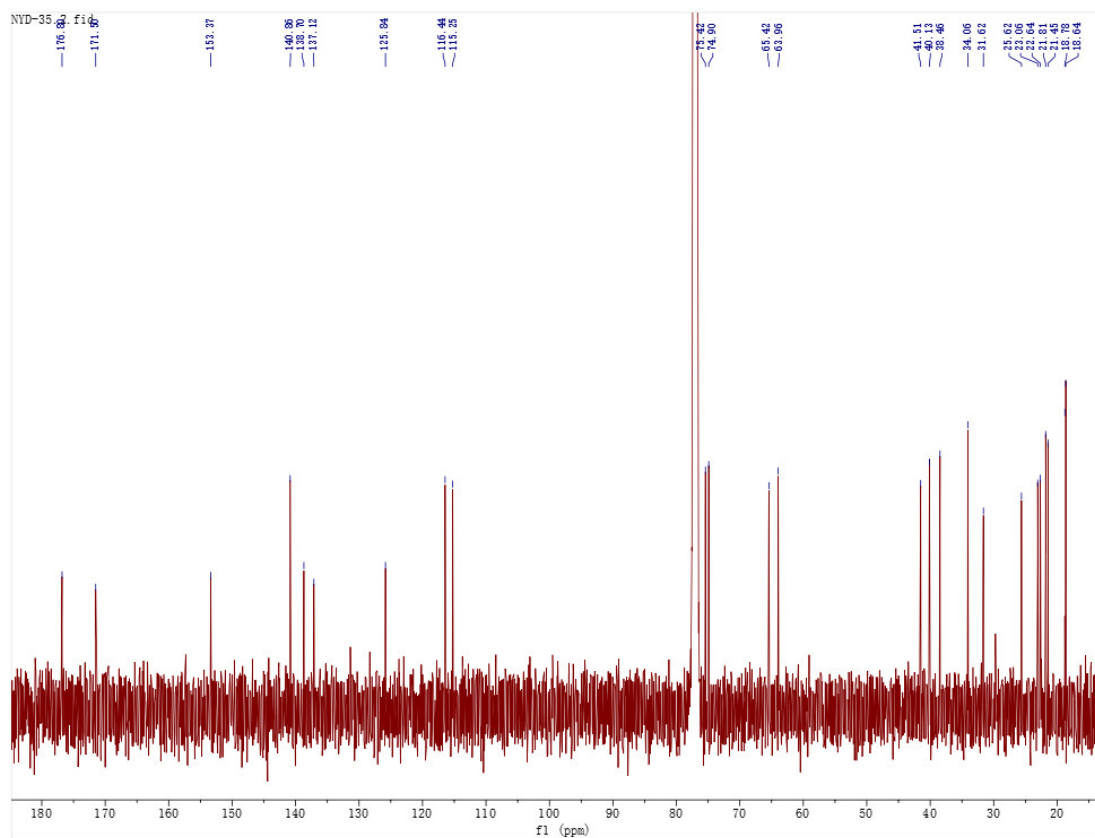

S3. DEPT135 spectrum of eutypellenone F (**1**) in CDCl<sub>3</sub>.

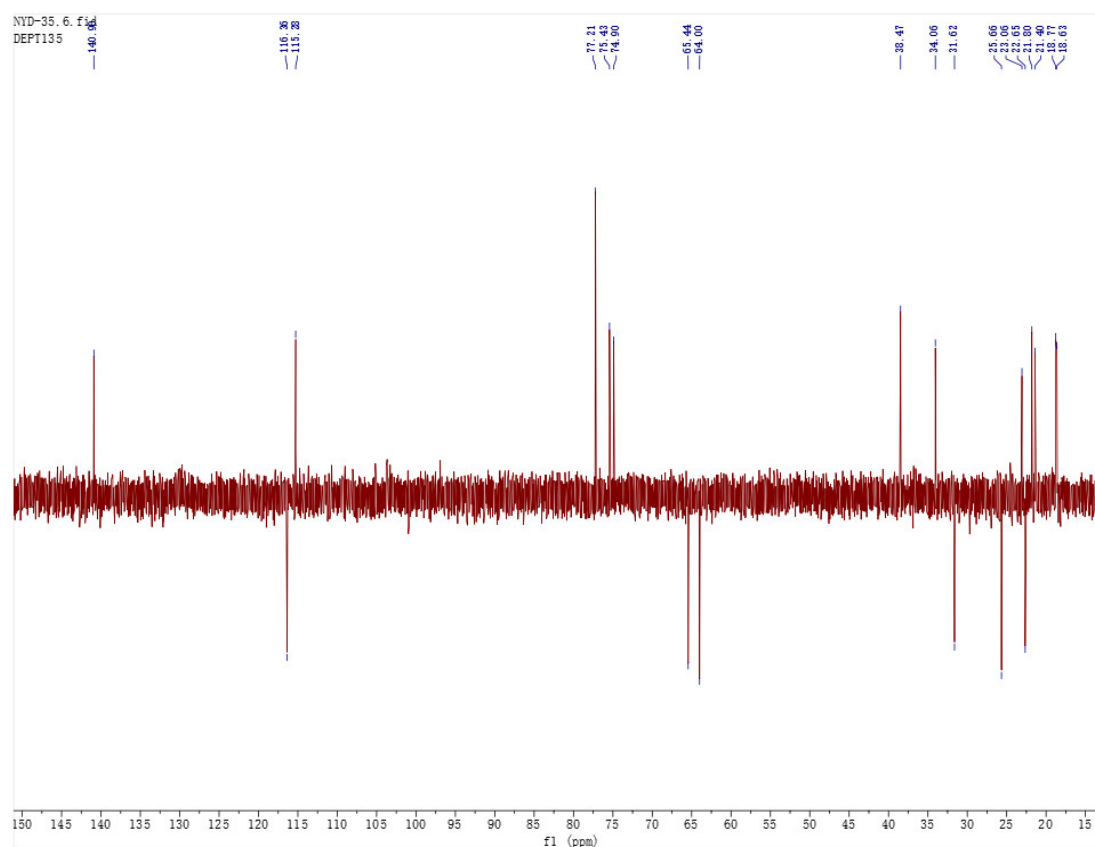

S4. HSQC spectrum of eutypellenone F (**1**) in CDCl<sub>3</sub>.

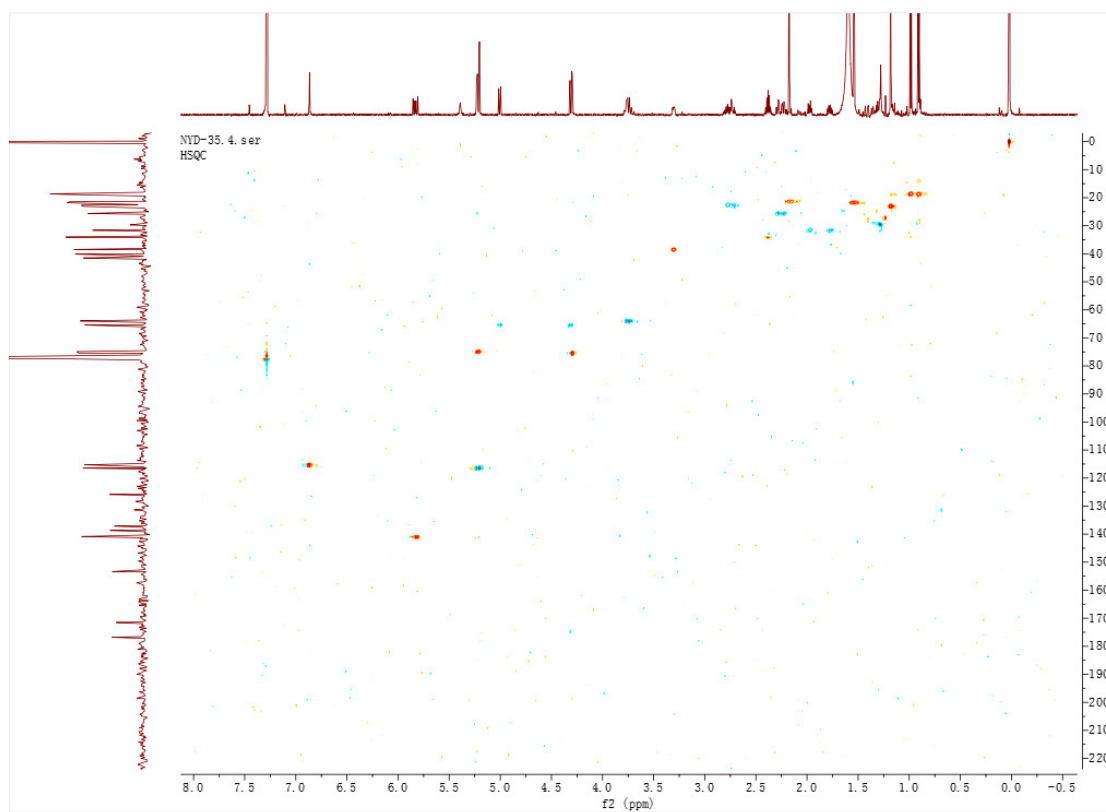

S5. COSY spectrum of eutypellenone F (**1**) in CDCl<sub>3</sub>.

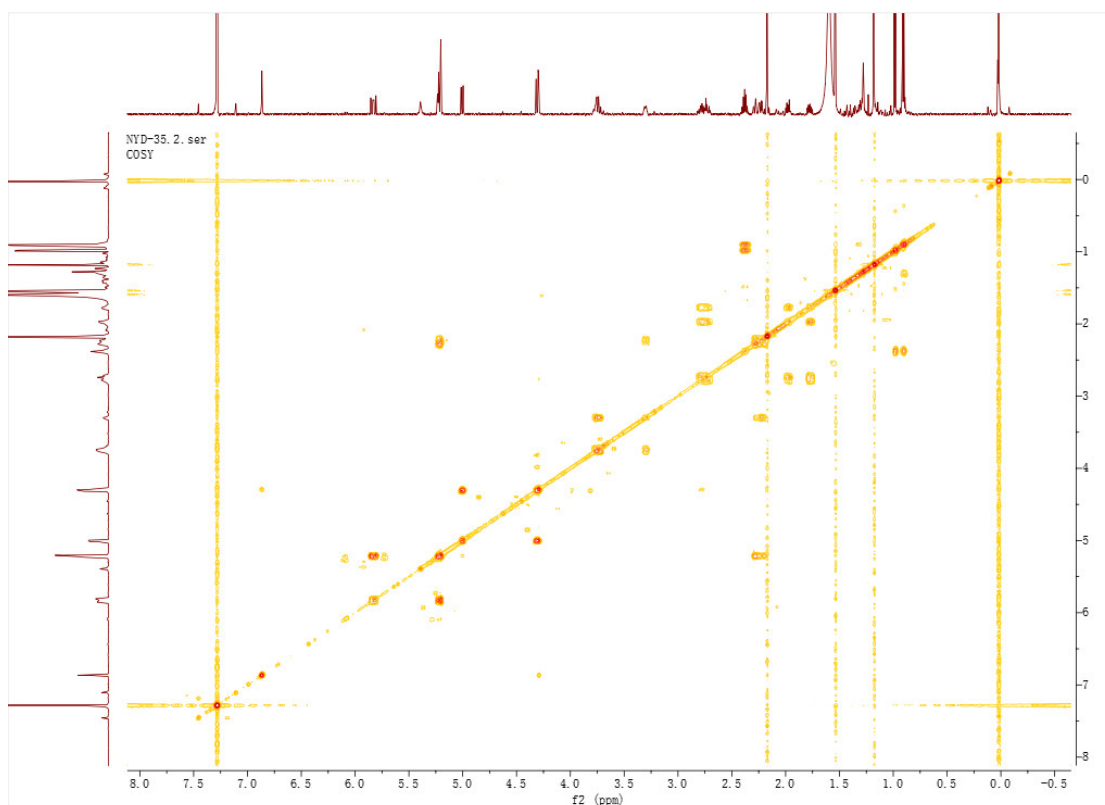

S6. HMBC spectrum of eutypellenone F (**1**) in CDCl<sub>3</sub>.

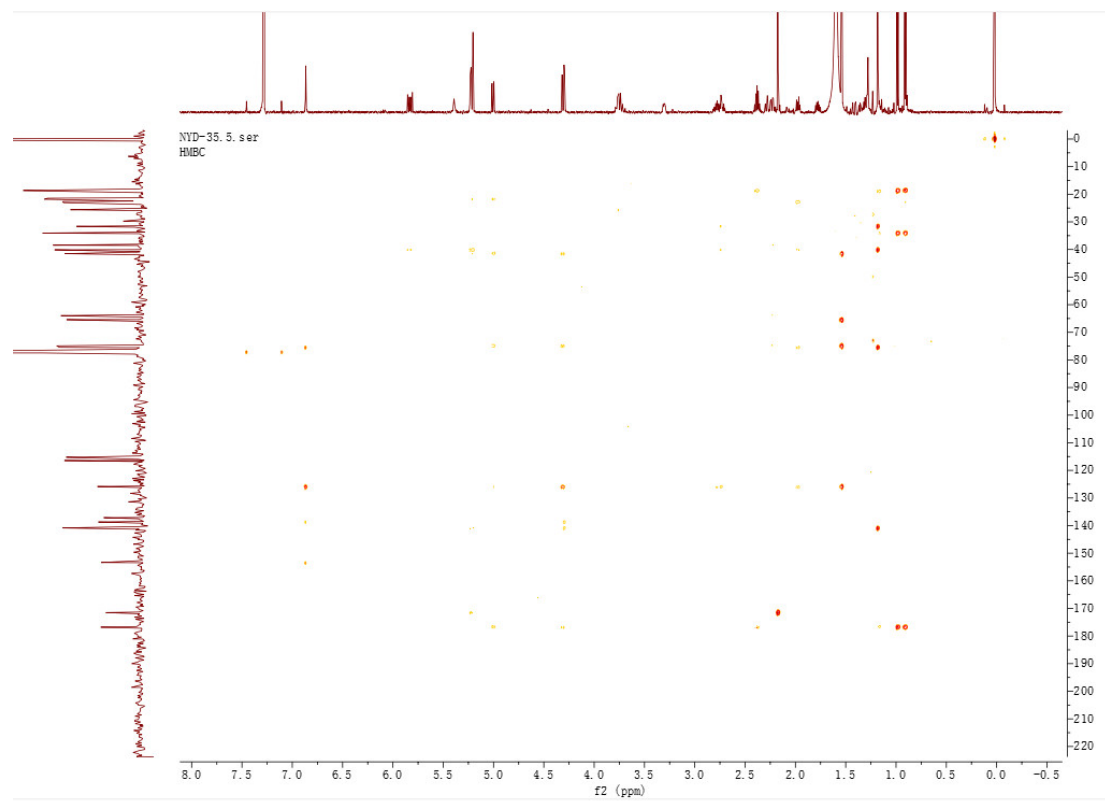

S7. NOESY spectrum of eutypellenone F (**1**) in CDCl<sub>3</sub>.

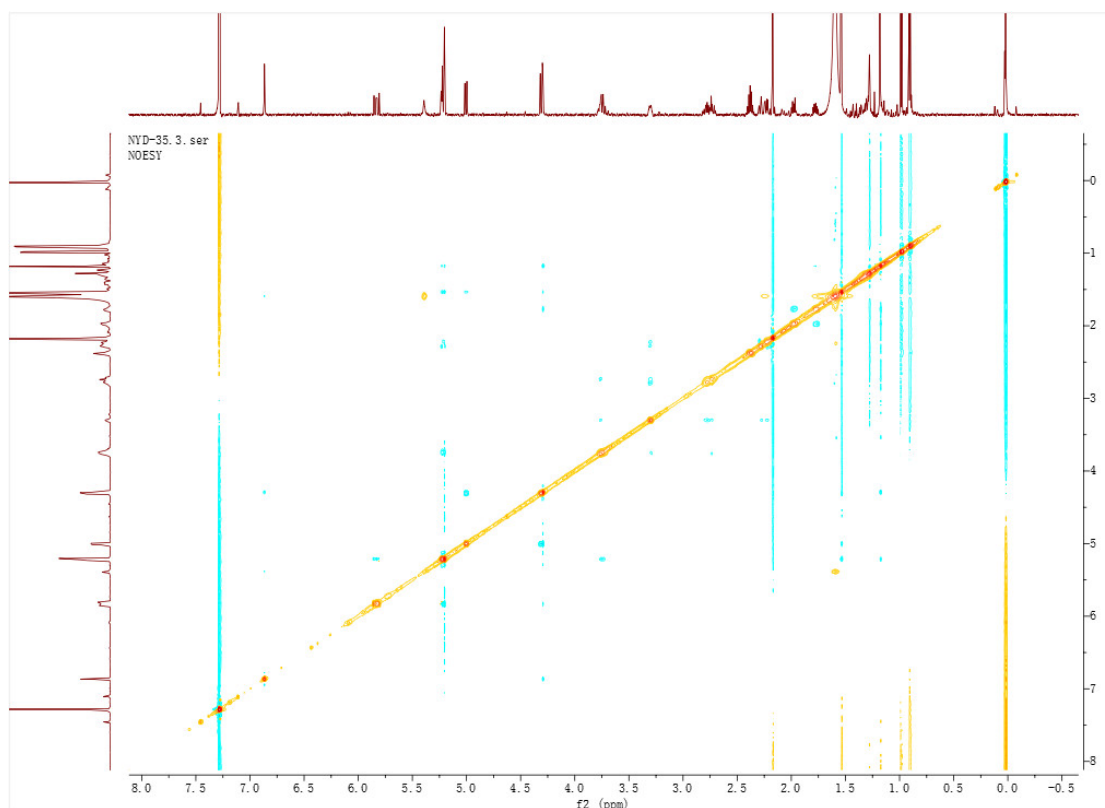

S8. HRESIMS of eutypellenone F (**1**).

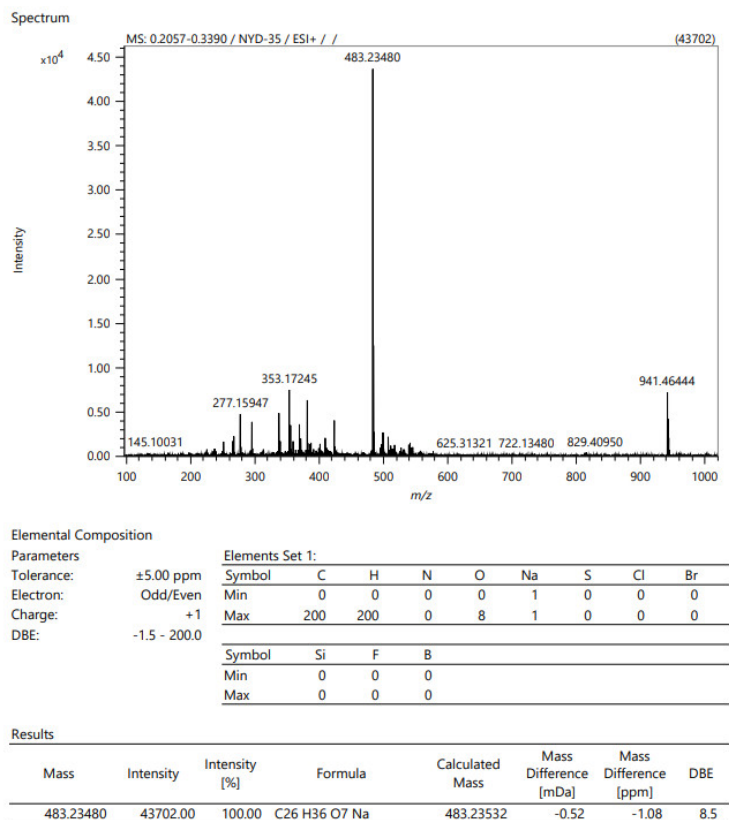

S9. UV spectrum of eutypellenone F (1).

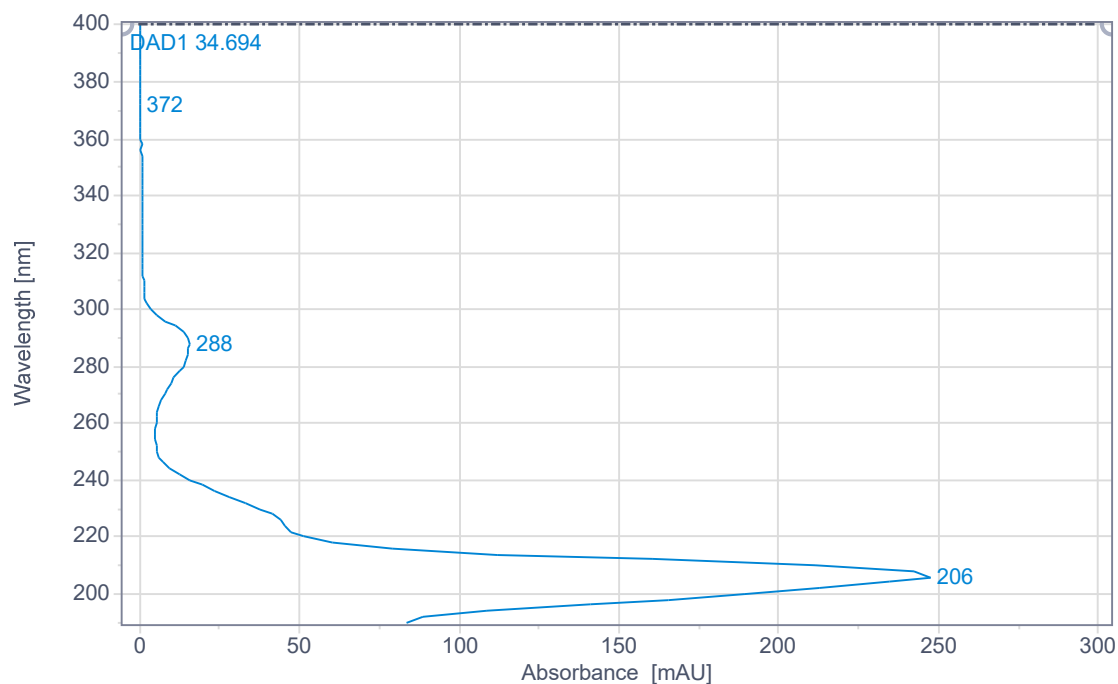

S10. ORD result of eutypellenone F (1)

## Anton Paar MCP 5500 - Measurement Results:

Software version: 4.00.11383.92

MCP serial number: 99030100

### Sample Information:

- Unique Sample Id: 51608
- Date: 2023-1-10
- Time: 15:24:32
- Method: Specific Rotation (25°C)
- Master Condition: valid
- Sample Name: NYD-35
- Concentration: 0.0500 g/100cm<sup>3</sup>
- User: student

### Measurement Result:

| Sub Measurement Number | Unique Sample Id | Time     | Optical Rotation | Sample Cell Temperature | Specific Rotation (calc.) |
|------------------------|------------------|----------|------------------|-------------------------|---------------------------|
|                        |                  |          | [°]              | [°C]                    | [°]                       |
| 1                      | 51609            | 15:23:17 | -0.0459          | 25.13                   | -91.7908                  |
| 2                      | 51610            | 15:23:35 | -0.0451          | 25.06                   | -90.1910                  |
| 3                      | 51611            | 15:23:53 | -0.0446          | 25.03                   | -89.1911                  |
| 4                      | 51612            | 15:24:12 | -0.0451          | 25.00                   | -90.1910                  |
| 5                      | 51613            | 15:24:31 | -0.0452          | 24.98                   | -90.3910                  |
| average                | 51608            | 15:24:32 | -0.0452          | 25.04                   | -90.3510                  |
| std. dev.              |                  |          | 0.000417         | 0.0525                  | 0.833210                  |

### GxP Information (at 589 nm):

- Last Quartz Adjustment: 2021-11-30 15:41:39 by Administrator

S11.  $^1\text{H}$  NMR spectrum of libertellenone Y (**2**) in  $\text{CDCl}_3$ .

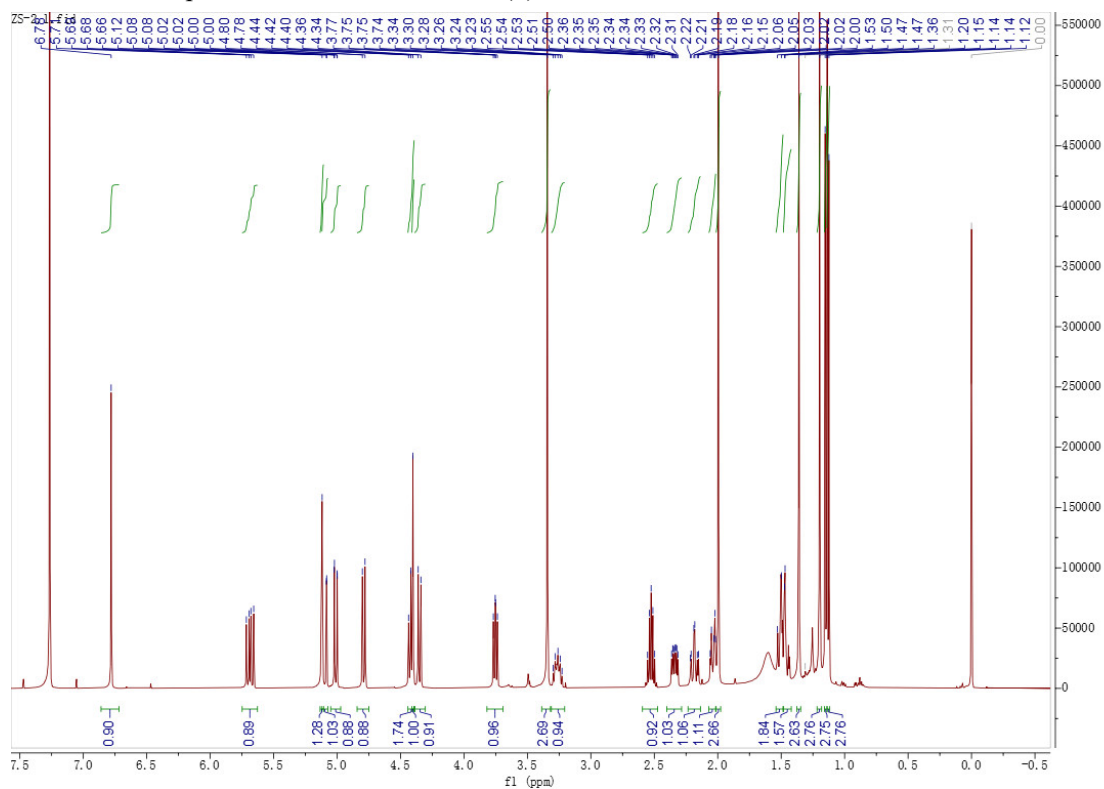

S12.  $^{13}\text{C}$  NMR spectrum of libertellenone Y (**2**) in  $\text{CDCl}_3$ .

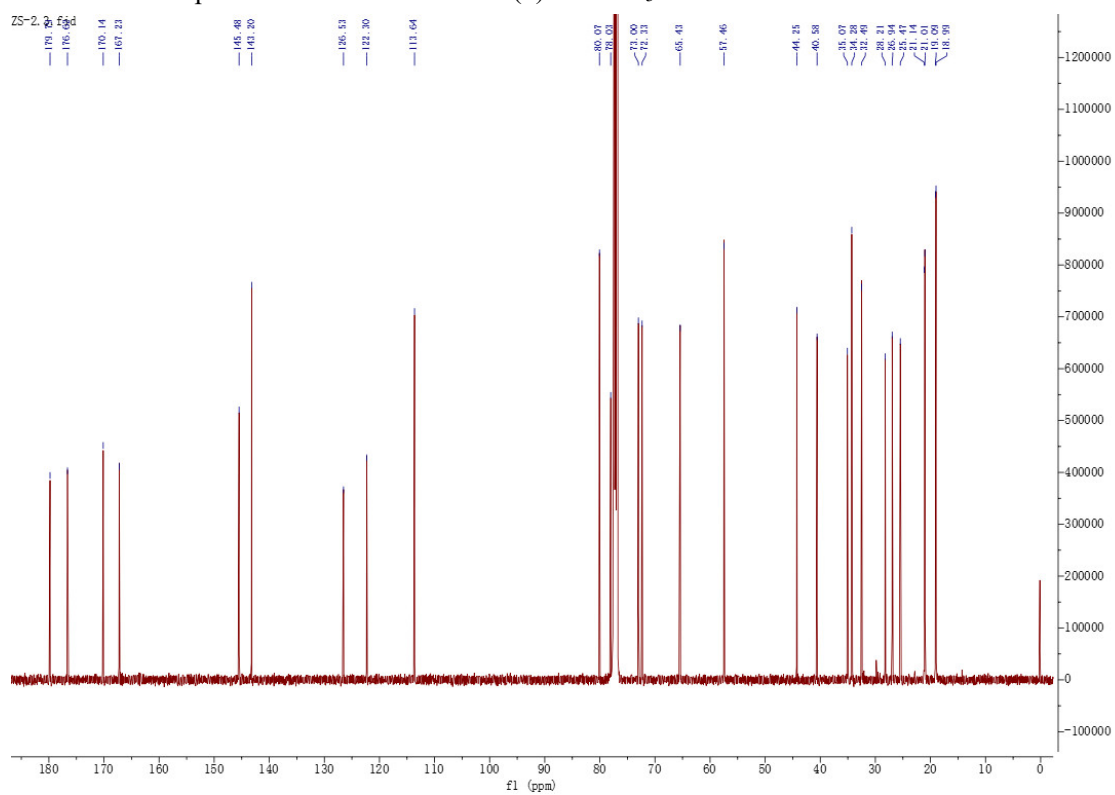

S13. DEPT135 spectrum of libertellenone Y (**2**) in CDCl<sub>3</sub>.

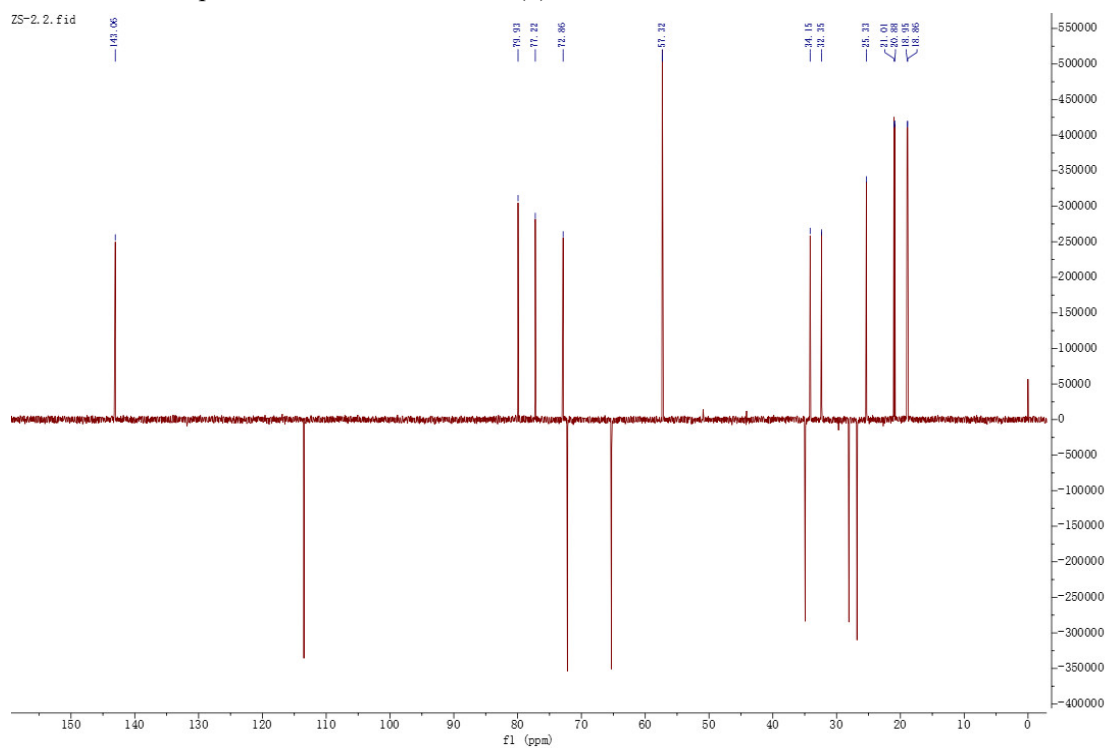

S14. HSQC spectrum of libertellenone Y (**2**) in CDCl<sub>3</sub>.

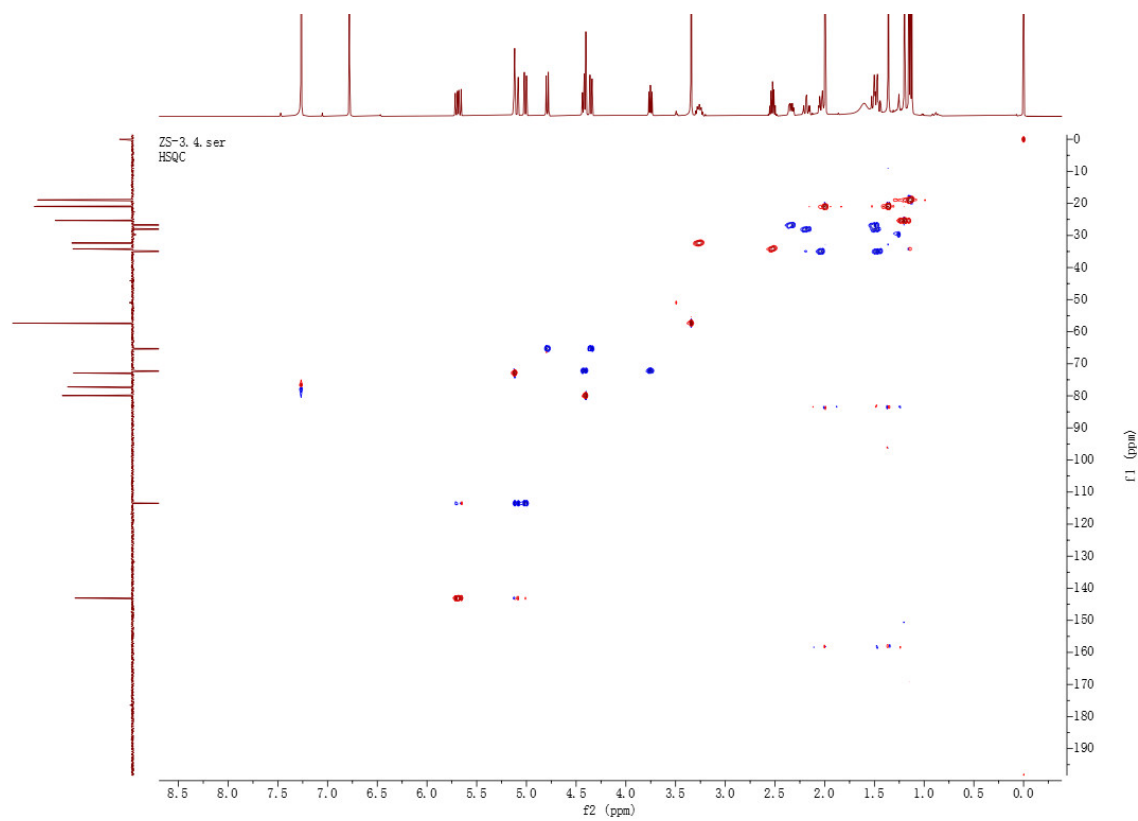

S15. COSY spectrum of libertellenone Y (**2**) in CDCl<sub>3</sub>.

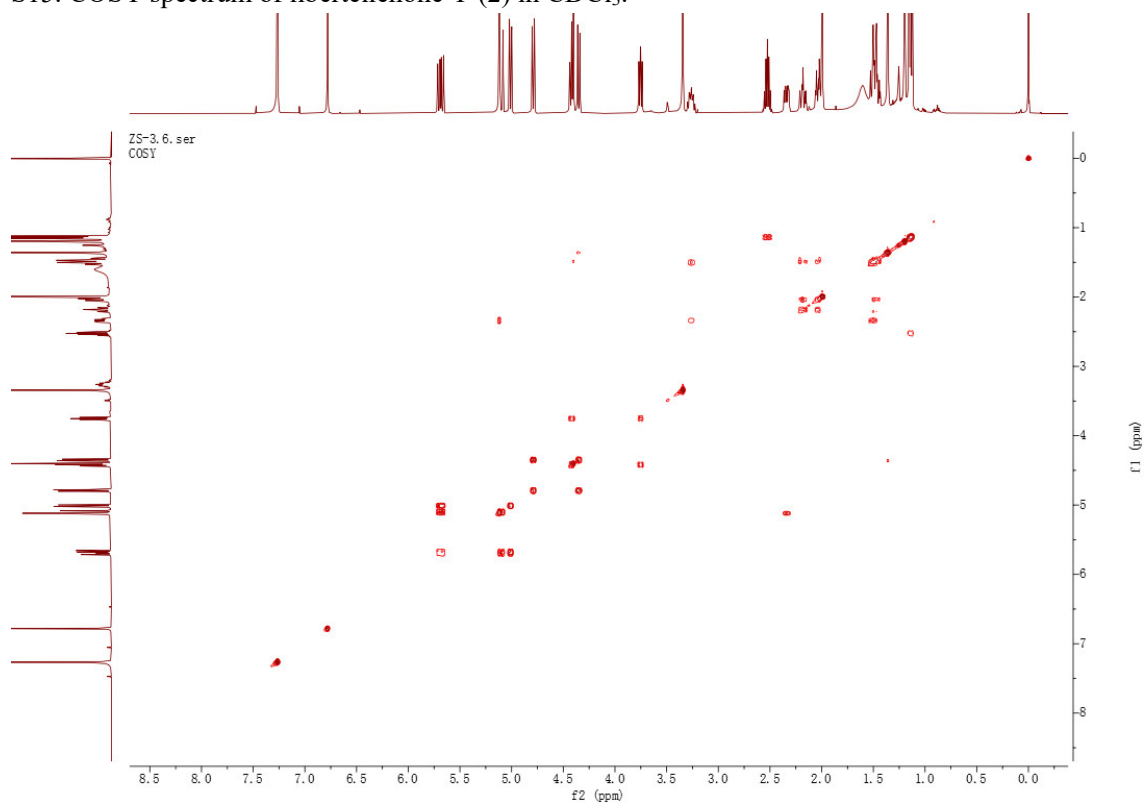

S16. HMBC spectrum of libertellenone Y (**2**) in CDCl<sub>3</sub>.

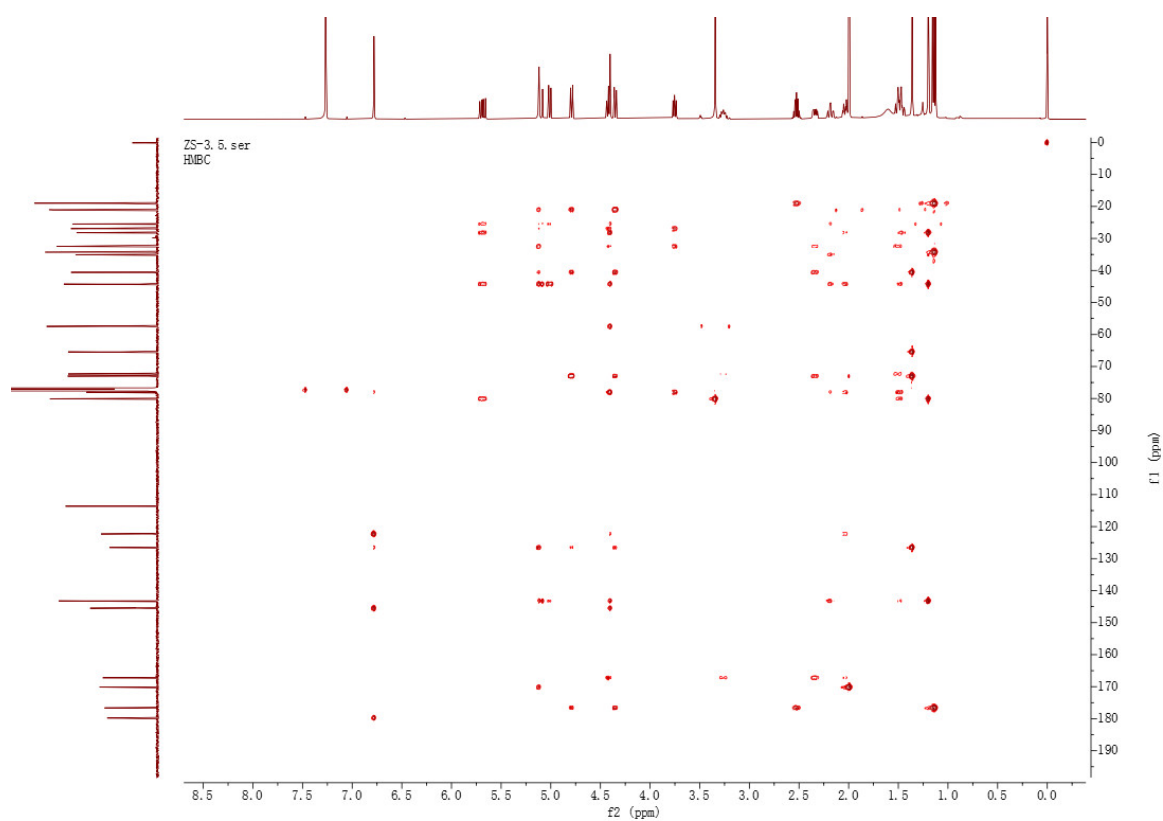

S17. NOESY spectrum of libertellenone Y (**2**) in CDCl<sub>3</sub>.

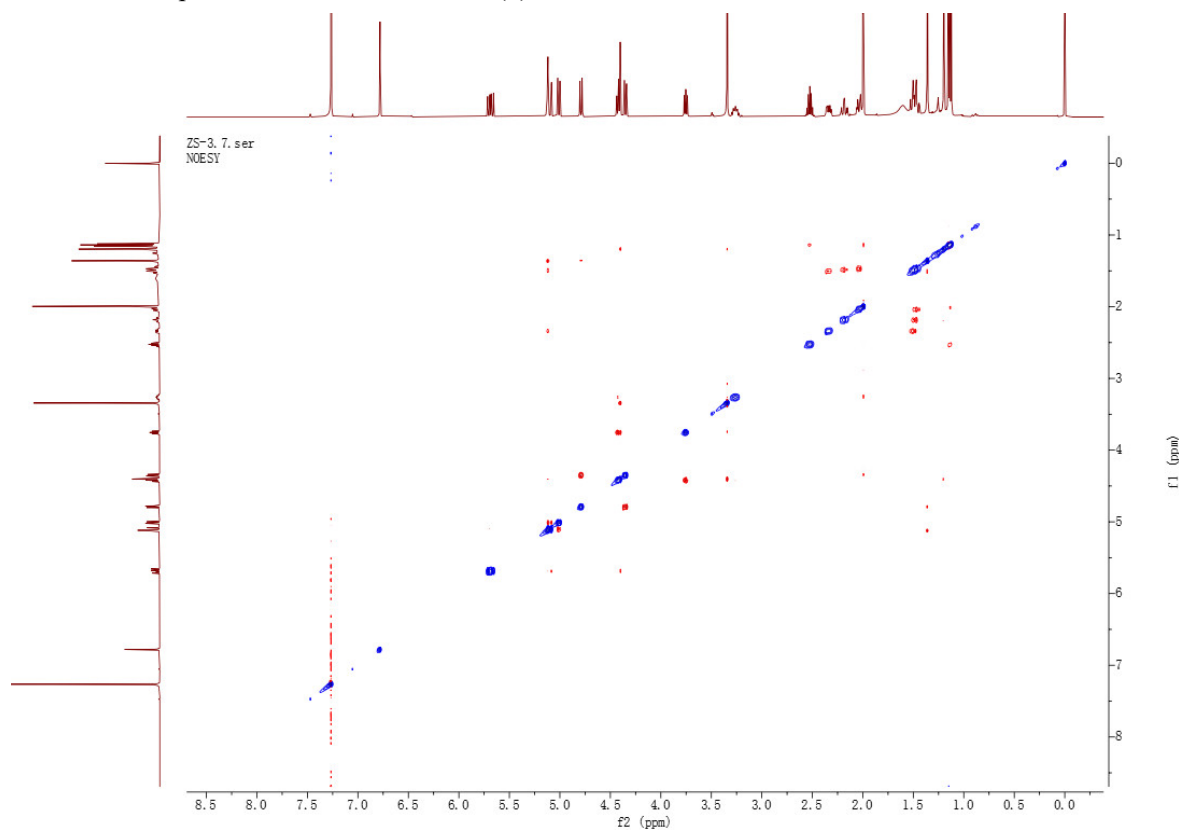

S18. HRESIMS of libertellenone Y (**2**).

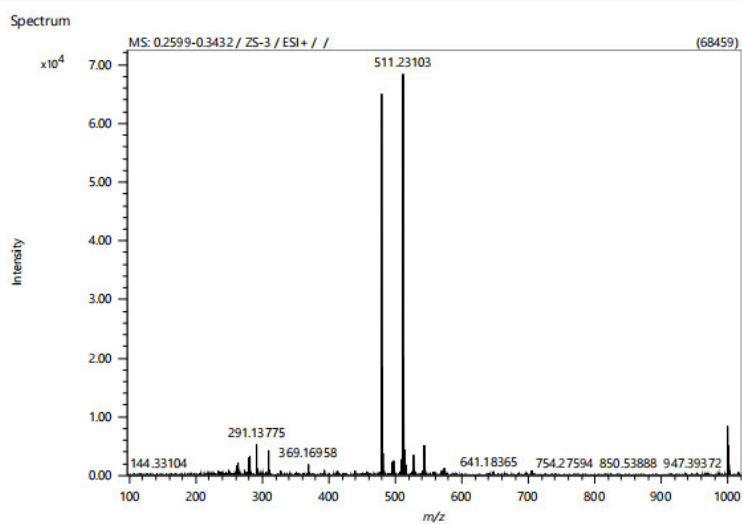

#### Elemental Composition

##### Parameters

Tolerance:  $\pm 5.00$  ppm  
 Electron: Odd/Even  
 Charge: +1  
 DBE: -1.5 - 200.0

##### Elements Set 1:

| Symbol | C   | H   | N | O | Na | S | Cl | Br |
|--------|-----|-----|---|---|----|---|----|----|
| Min    | 0   | 0   | 0 | 0 | 1  | 0 | 0  | 0  |
| Max    | 200 | 200 | 0 | 8 | 1  | 0 | 0  | 0  |

  

| Symbol | Si | F | B | P |
|--------|----|---|---|---|
| Min    | 0  | 0 | 0 | 0 |
| Max    | 0  | 0 | 0 | 0 |

#### Results

| Mass      | Intensity | Intensity [%] | Formula       | Calculated Mass | Mass Difference [mDa] | Mass Difference [ppm] | DBE |
|-----------|-----------|---------------|---------------|-----------------|-----------------------|-----------------------|-----|
| 511.23103 | 68459.15  | 100.00        | C27 H36 O8 Na | 511.23024       | 0.79                  | 1.55                  | 9.5 |

S19.  $^1\text{H}$  NMR spectrum of libertellenone Z (**3**) in  $\text{CDCl}_3$ .

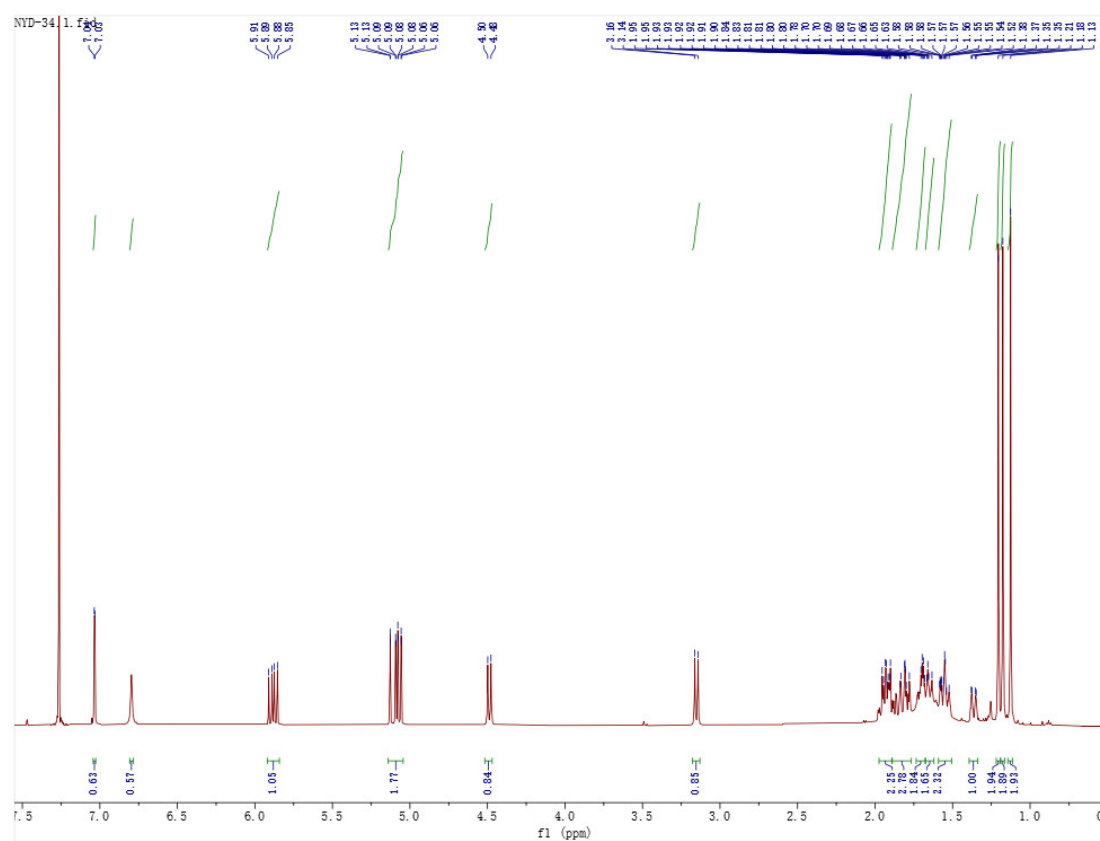

S20. <sup>13</sup>C NMR spectrum of libertellenone Z (**3**) in CDCl<sub>3</sub>.

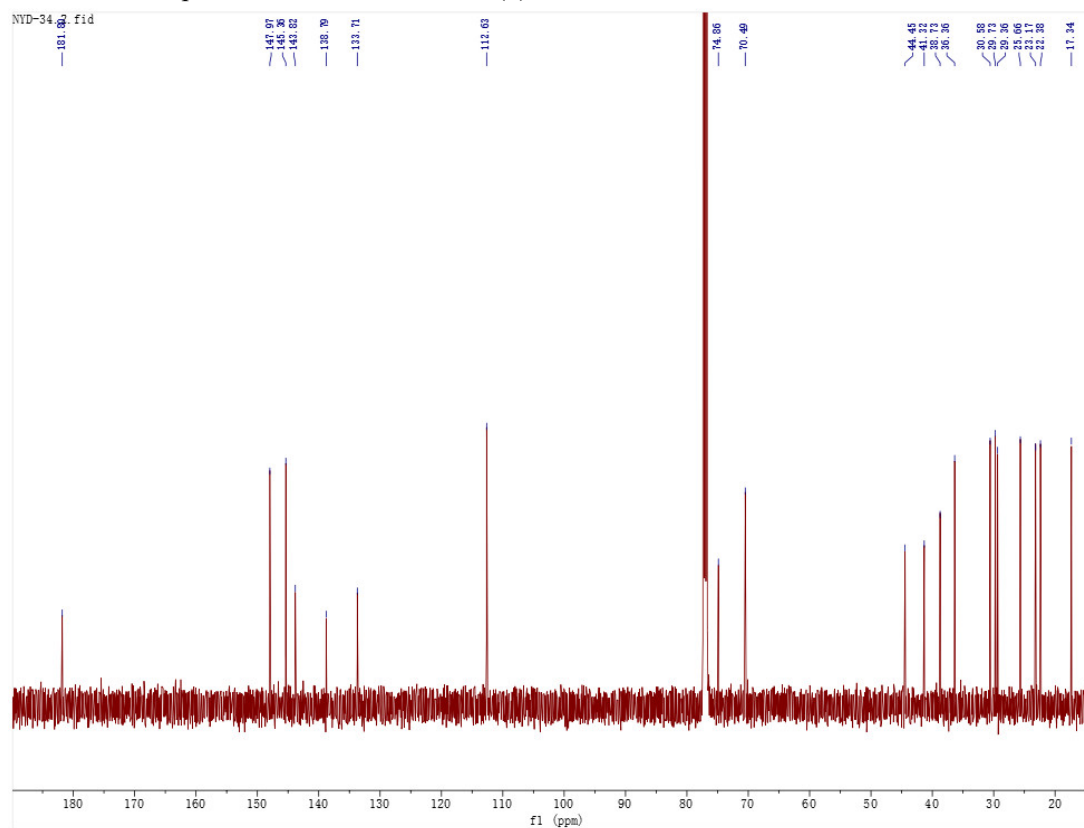

S21. DEPT135 spectrum of libertellenone Z (**3**) in CDCl<sub>3</sub>.

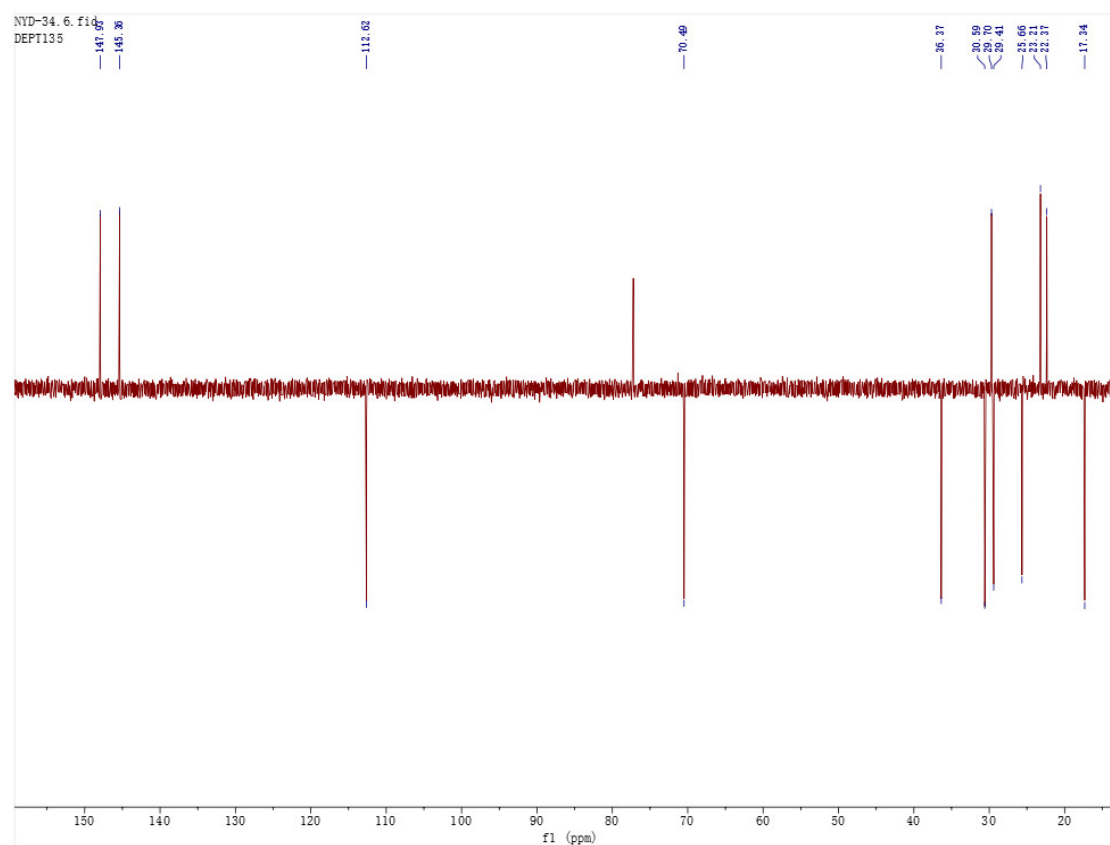

S22. HSQC spectrum of libertellenone Z (**3**) in CDCl<sub>3</sub>.

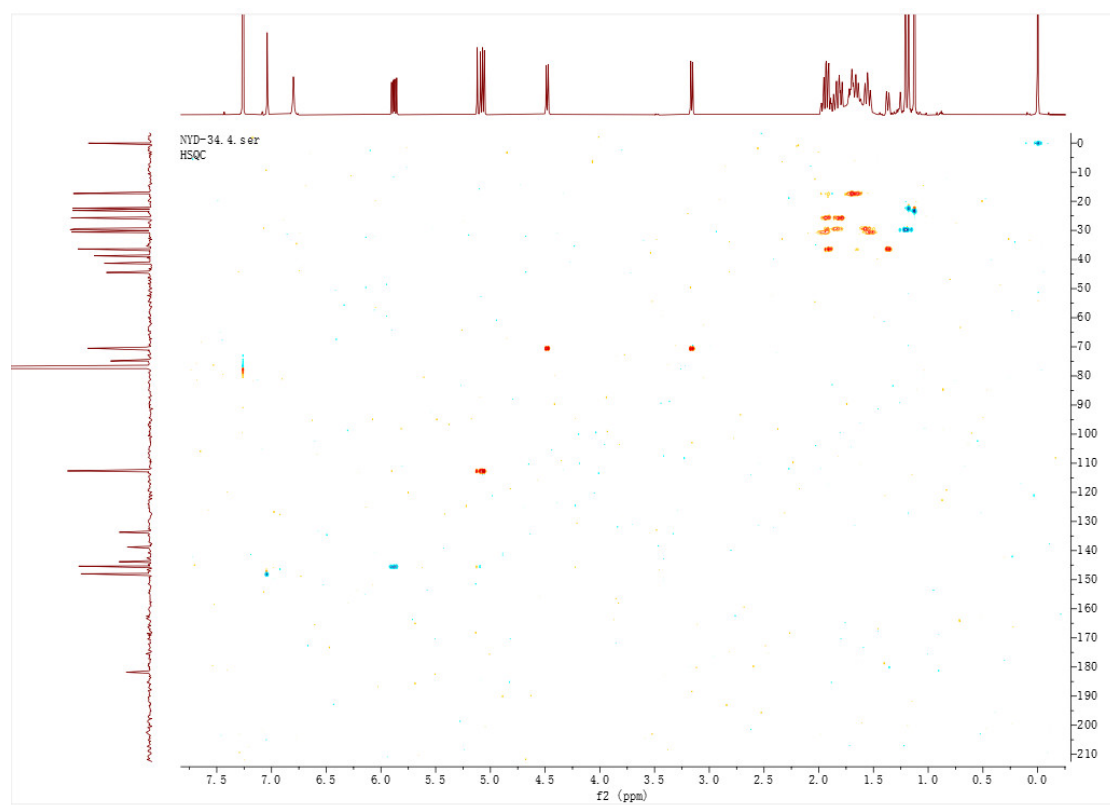

S23. COSY spectrum of libertellenone Z (**3**) in CDCl<sub>3</sub>.

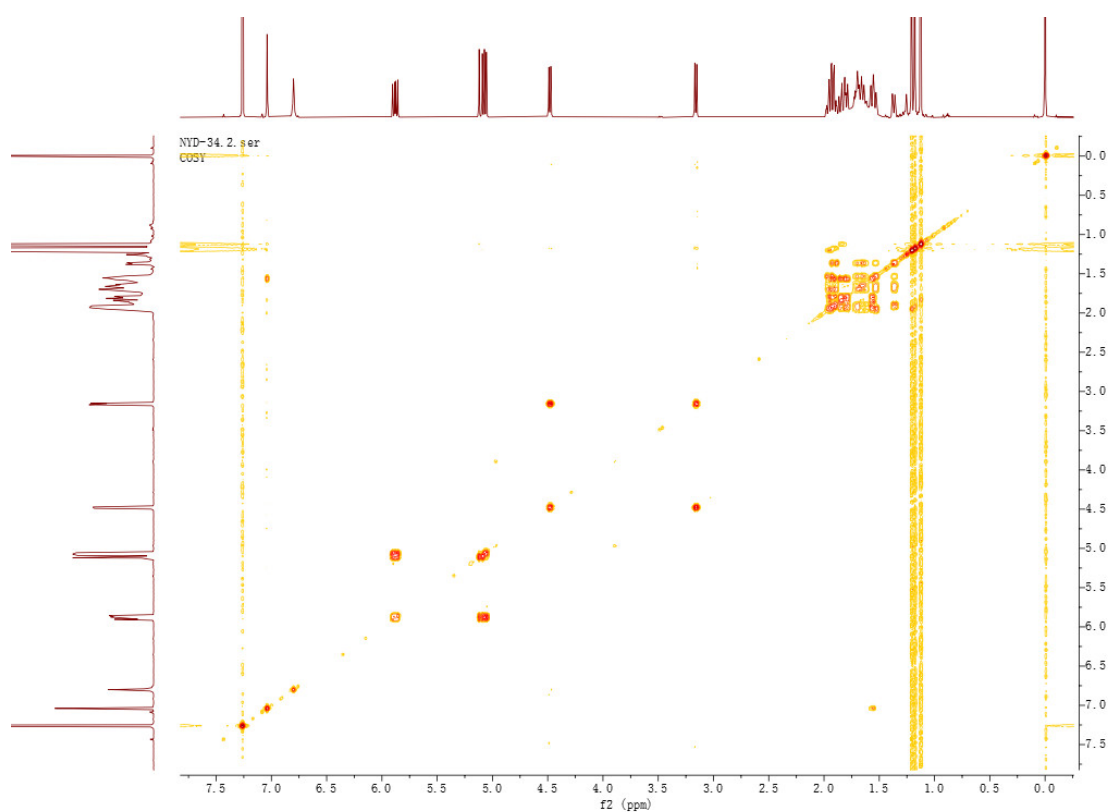

S24. HMBC spectrum of libertellenone Z (**3**) in CDCl<sub>3</sub>.

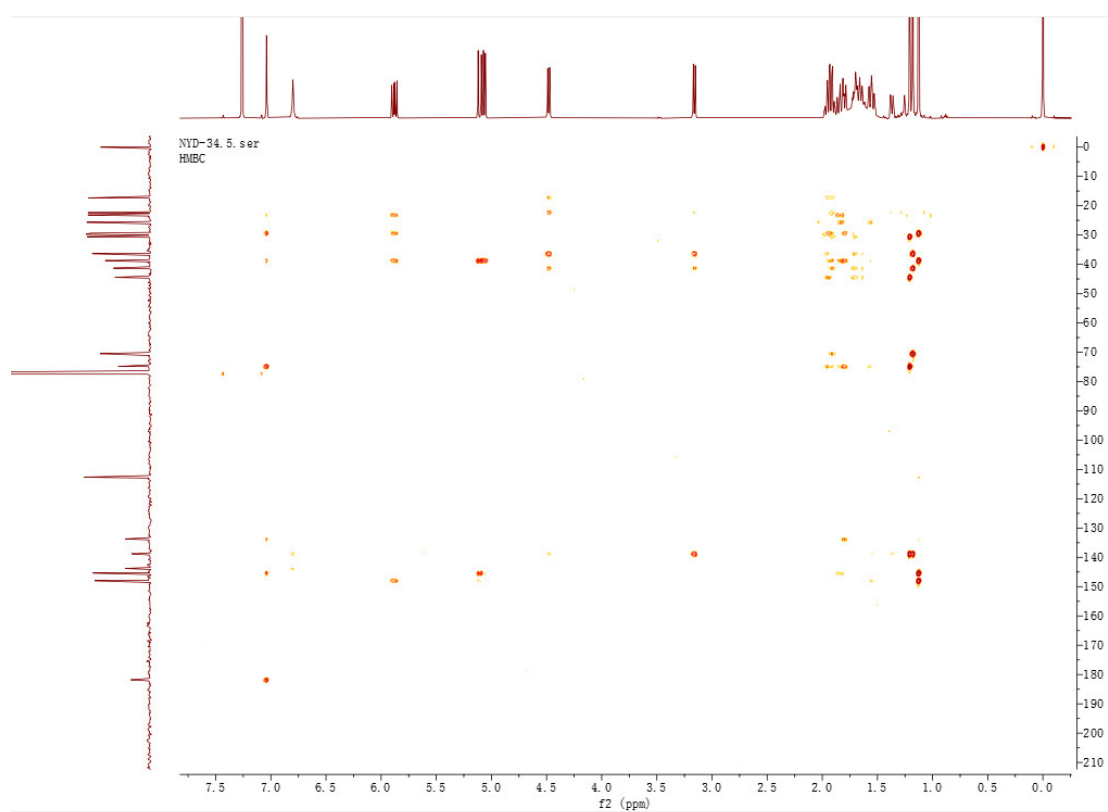

S25. NOESY spectrum of libertellenone **3** in CDCl<sub>3</sub>.

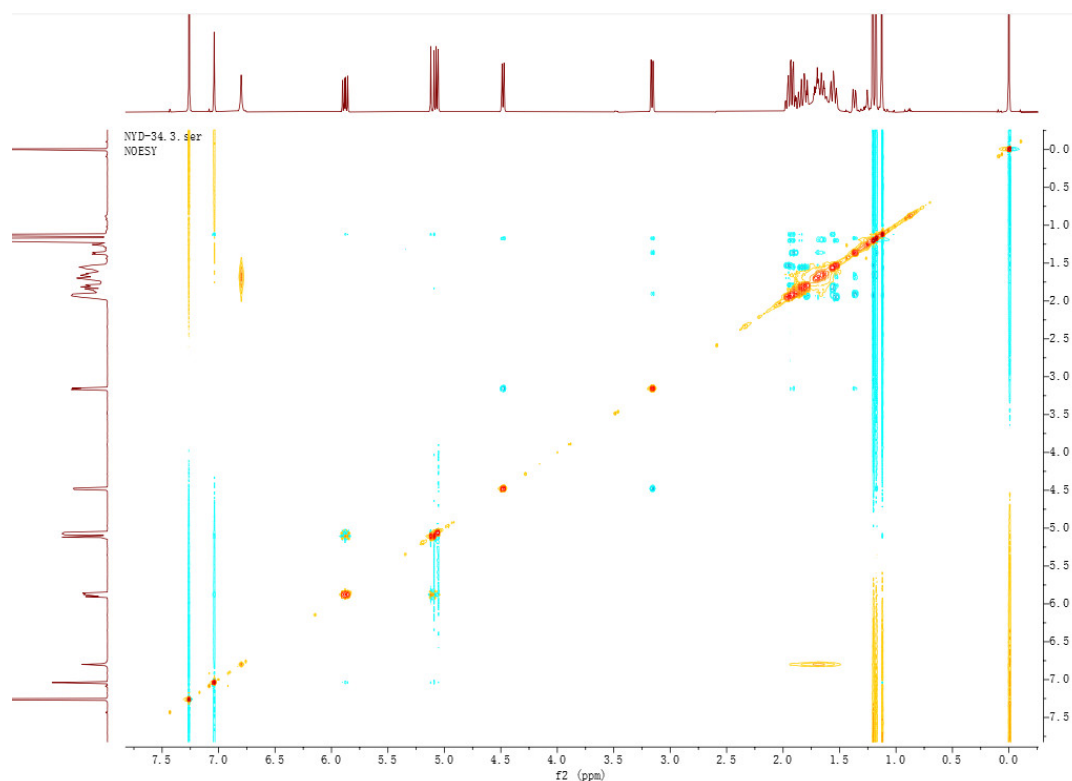

S26. HRESIMS of libertellenone **3**.

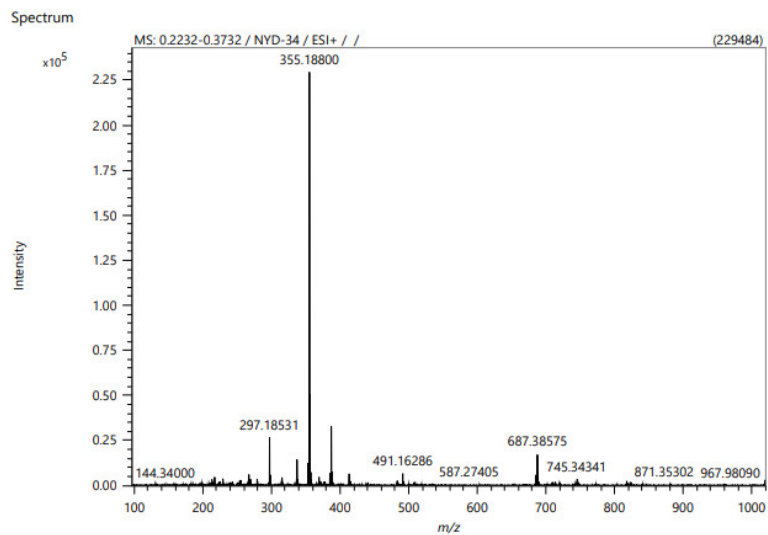

#### Elemental Composition

##### Parameters

Tolerance:  $\pm 5.00$  ppm  
 Electron: Odd/Even  
 Charge: +1  
 DBE: -1.5 - 200.0

##### Elements Set 1:

| Symbol | C   | H   | N | O | Na | S | Cl | Br |
|--------|-----|-----|---|---|----|---|----|----|
| Min    | 0   | 0   | 0 | 0 | 1  | 0 | 0  | 0  |
| Max    | 200 | 200 | 3 | 8 | 1  | 0 | 0  | 0  |

  

| Symbol | Si | F |
|--------|----|---|
| Min    | 0  | 0 |
| Max    | 0  | 0 |

#### Results

| Mass      | Intensity | Intensity [%] | Formula                                                          | Calculated Mass | Mass Difference [mDa] | Mass Difference [ppm] | DBE |
|-----------|-----------|---------------|------------------------------------------------------------------|-----------------|-----------------------|-----------------------|-----|
| 355.18800 | 229483.69 | 100.00        | C <sub>20</sub> H <sub>28</sub> O <sub>4</sub> Na                | 355.18798       | 0.02                  | 0.06                  | 6.5 |
|           |           |               | C <sub>18</sub> H <sub>26</sub> N <sub>3</sub> O <sub>3</sub> Na | 355.18664       | 1.36                  | 3.84                  | 7.0 |

S27. UV spectrum of libertellenone Z (3).

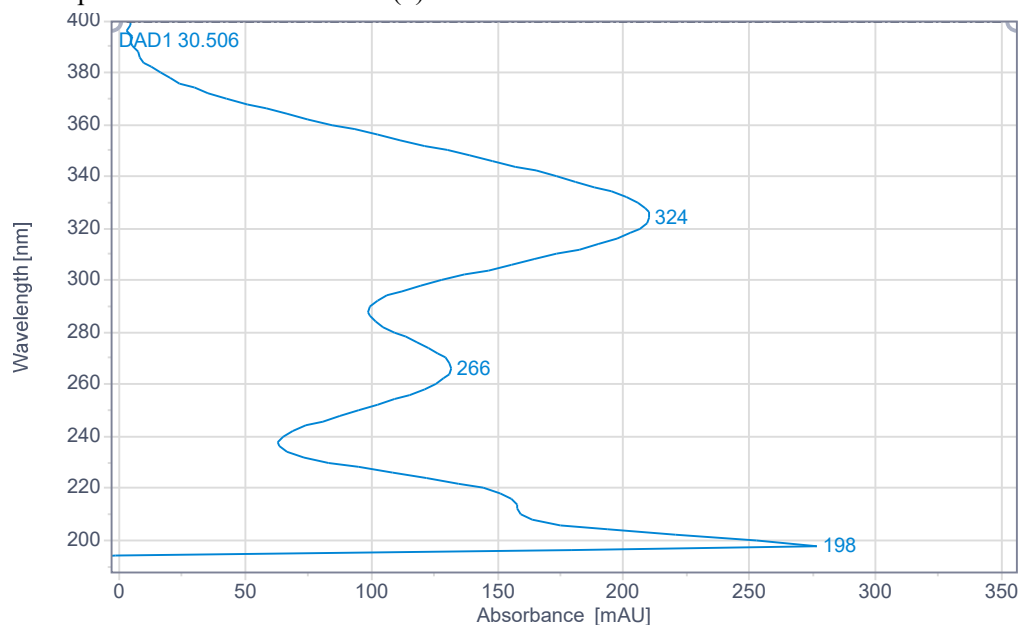

S28. ORD result of libertellenone Z (3)

### Anton Paar MCP 5500 - Measurement Results:

Software version: 4.00.11383.92

MCP serial number: 99030100

#### Sample Information:

► Unique Sample Id: 50966  
 ► Date: 2022-12-16  
 ► Time: 14:11:51  
 ► Method: Specific Rotation (25°C)  
 ► Master Condition: valid  
 ► Sample Name: NYD-34  
 ► Concentration: 0.0500 g/100cm<sup>3</sup>  
 ► User: student

#### Measurement Result:

| Sub Measurement Number | Unique Sample Id | Time     | Optical Rotation | Sample Cell Temperature | Specific Rotation (calc.) |
|------------------------|------------------|----------|------------------|-------------------------|---------------------------|
|                        |                  |          | [°]              | [°C]                    | [°]                       |
| 1                      | 50967            | 14:10:24 | -0.0385          | 25.05                   | -76.9923                  |
| 2                      | 50968            | 14:10:42 | -0.0390          | 24.97                   | -77.9922                  |
| 3                      | 50969            | 14:11:00 | -0.0393          | 24.92                   | -78.5921                  |
| 4                      | 50970            | 14:11:32 | -0.0397          | 24.89                   | -79.3921                  |
| 5                      | 50971            | 14:11:50 | -0.0401          | 24.89                   | -80.1920                  |
| average                | 50966            | 14:11:51 | -0.0393          | 24.94                   | -78.6321                  |
| std. dev.              |                  |          | 0.000553         | 0.0605                  | 1.105523                  |

#### GxP Information (at 589 nm):

► Last Quartz Adjustment: 2021-11-30 15:41:39 by Administrator

S29.  $^1\text{H}$  NMR spectrum of **4** in  $\text{CDCl}_3$ .

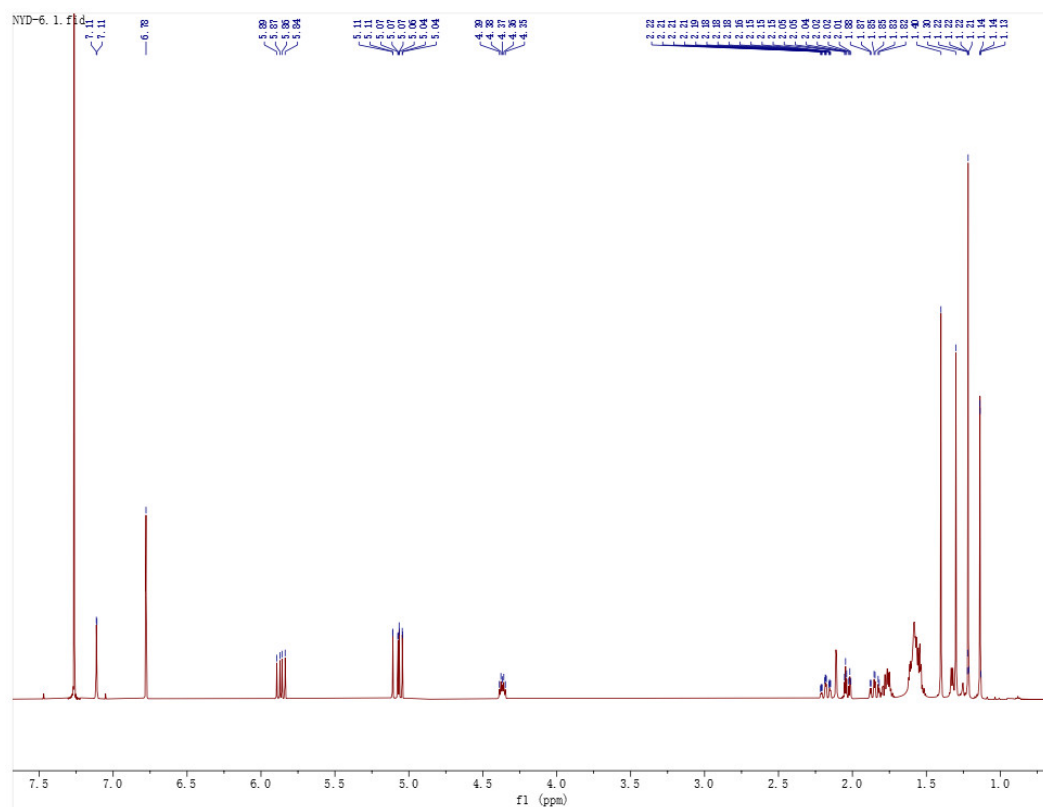

S30.  $^{13}\text{C}$  NMR spectrum of **4** in  $\text{CDCl}_3$ .

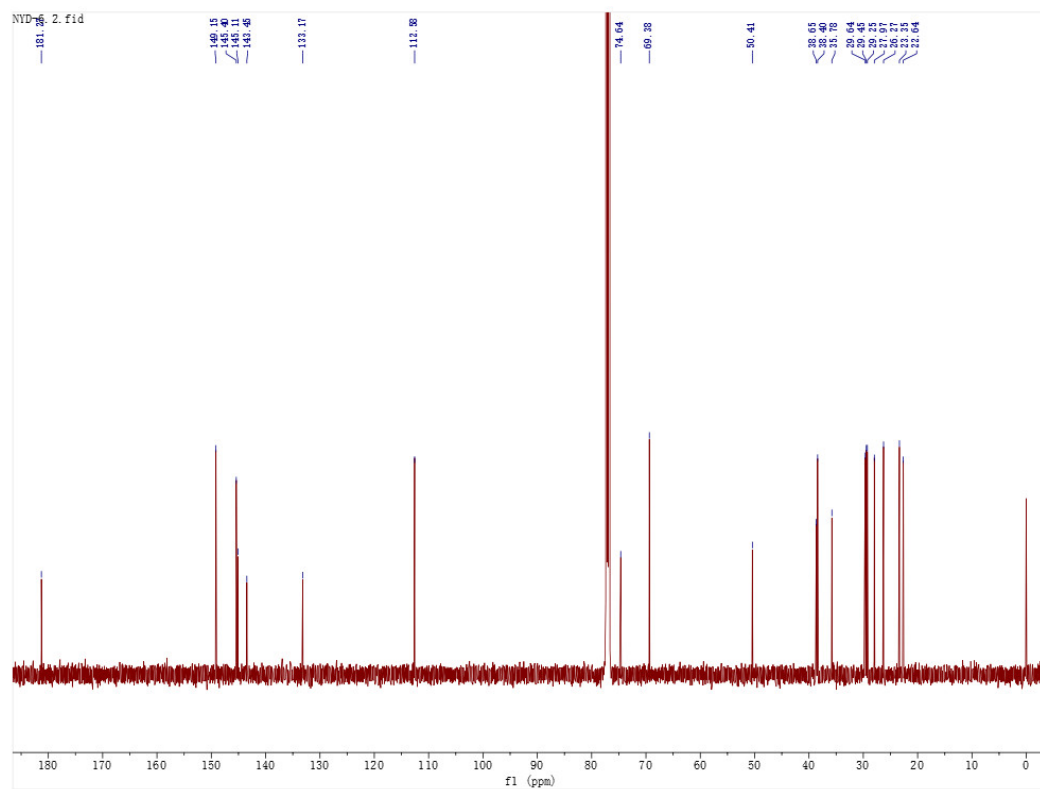

S31.  $^1\text{H}$  NMR spectrum of **5** in  $\text{CDCl}_3$ .

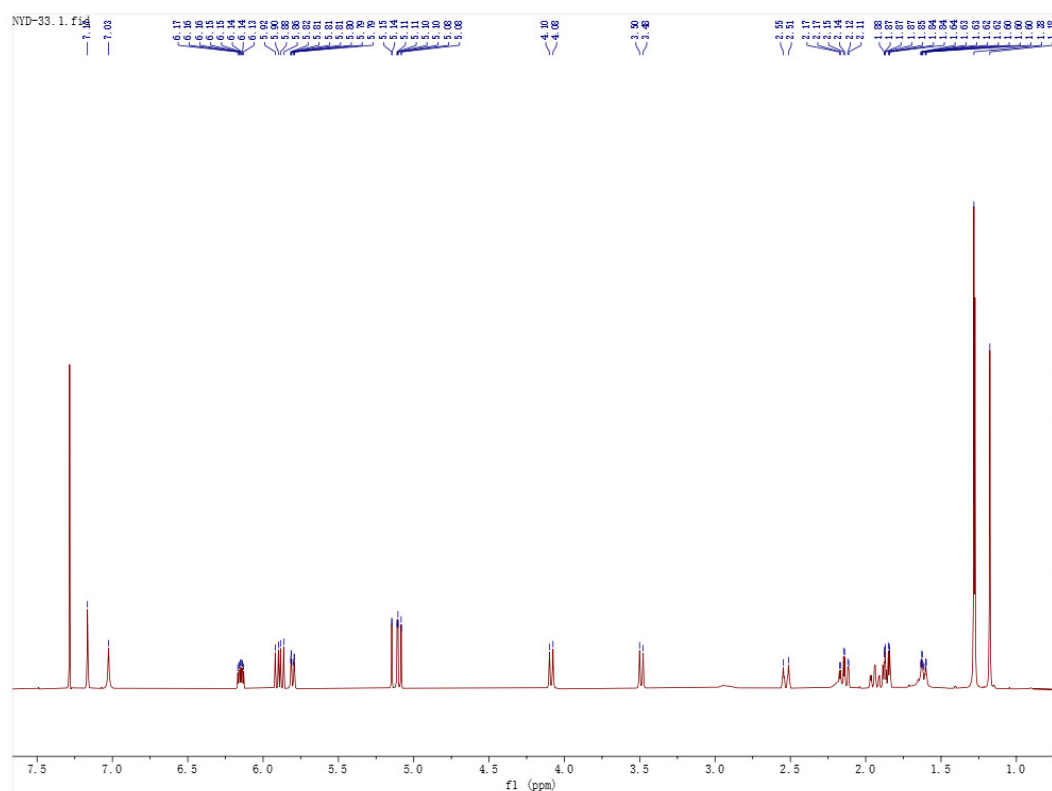

S33.  $^1\text{H}$  NMR spectrum of **6** in  $\text{CDCl}_3$ .

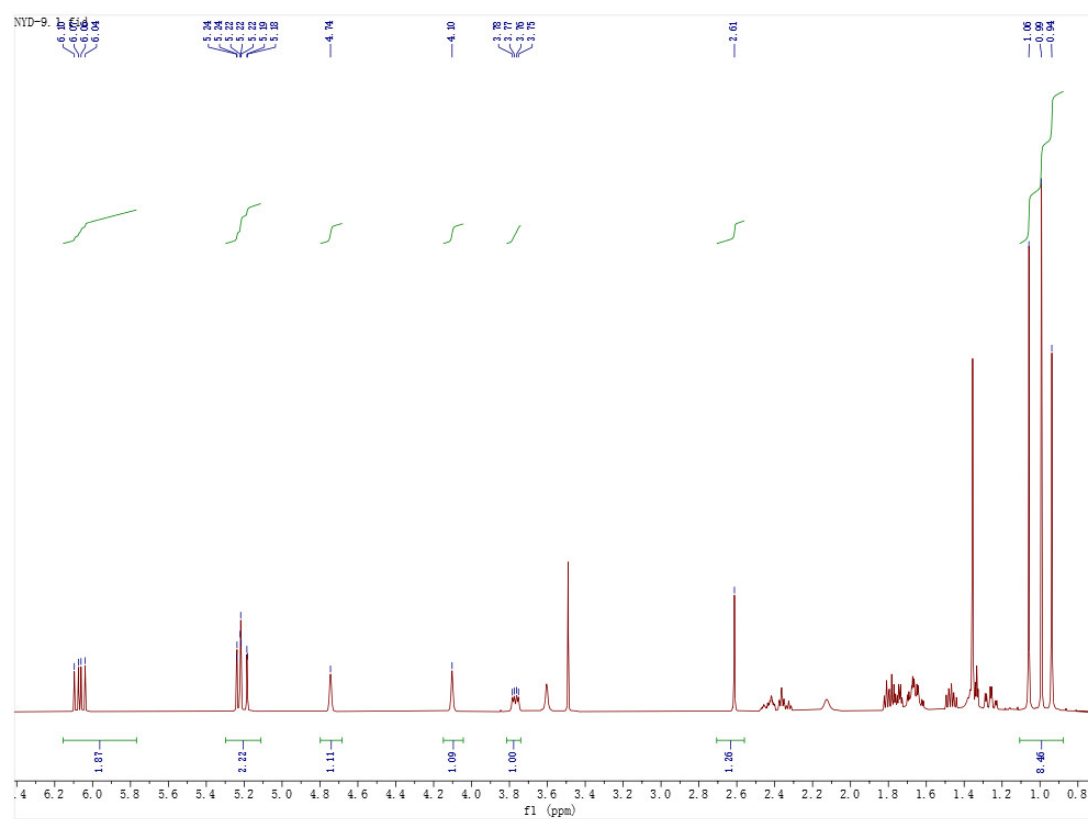

S34.  $^{13}\text{C}$  NMR spectrum of **6** in  $\text{CDCl}_3$ .

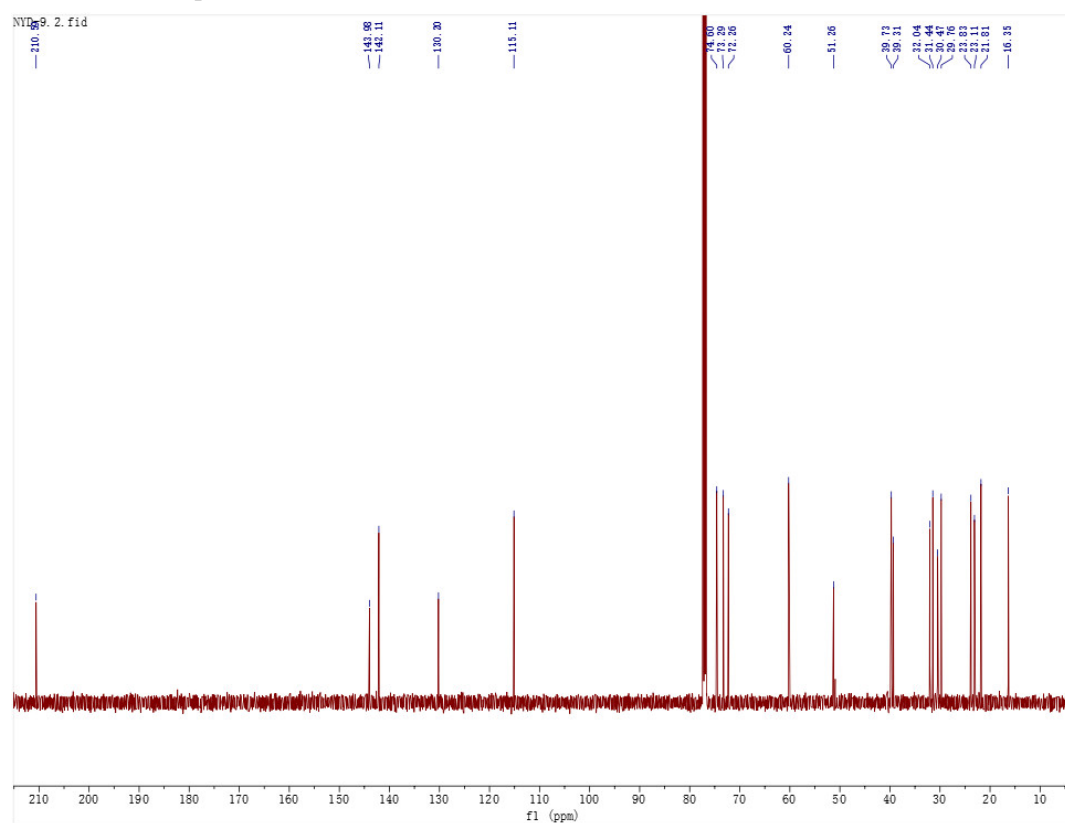

S35.  $^1\text{H}$  NMR spectrum of **7** in  $\text{CDCl}_3$ .

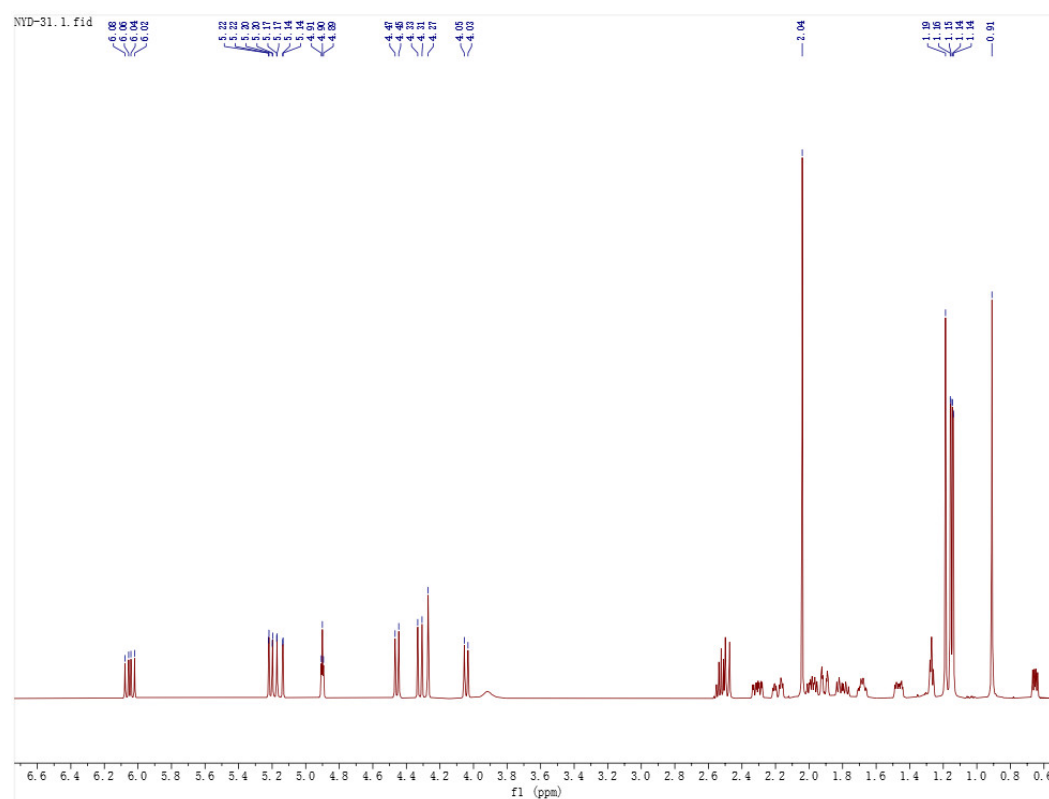

S36.  $^{13}\text{C}$  NMR spectrum of **7** in  $\text{CDCl}_3$ .

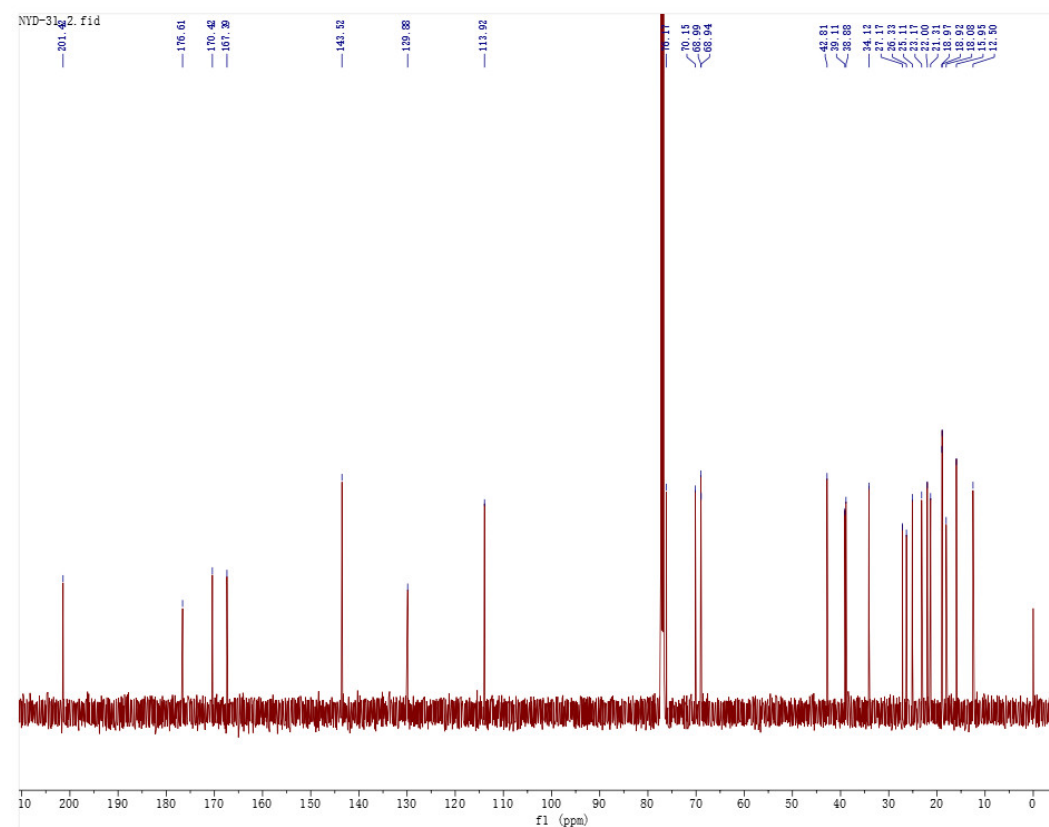

S37. The colony and mycelium characteristics of *Eutypella* sp. D-1 .

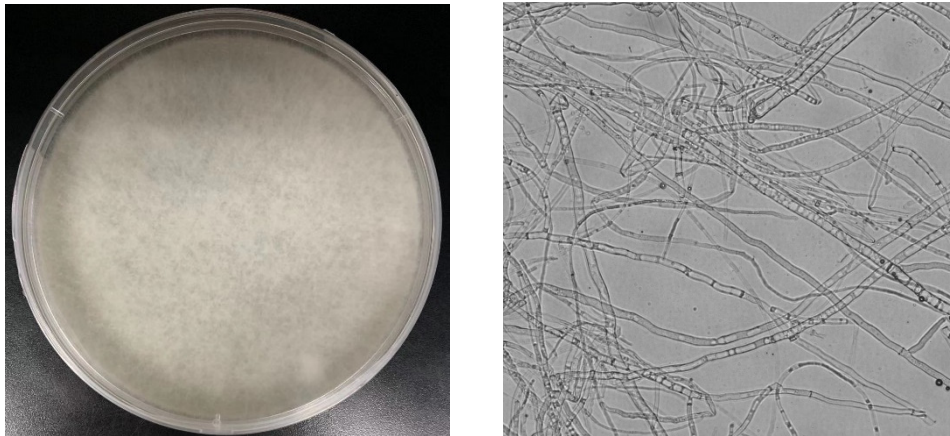

Supplement: s1 [file s1]
